# Supplementary material for: Band structure engineering of monolayer MoS2by surface ligand functionalization for enhanced photoelectrochemical hydrogen production activity
Source: Royal Society of Chemistry journal article supplement (doi:10.1039/c4nr02829e), 2014-01-01
Supplement: c4nr02829e1.pdf [file c4nr02829e1.pdf]

## Supporting Information

### Band Structure Engineering of Monolayer MoS<sub>2</sub> by Surface Ligand Modification for Enhanced Photoelectrochemical Hydrogen production Activity

#### The calculation of the average electrostatic potential

The plane average potential can be defined as  $\bar{V}(z) = \frac{1}{A} \iint_{cell} V(x, y, z) dx dy$ , where  $A$  is the area of the surface unit cell,  $V(x, y, z)$  is the electrostatic potential on a grid in real space. Plotting  $\bar{V}(z)$  as the function of  $z$ , we can easily obtain the value  $V(\infty)$ , which is the electrostatic potential of the vacuum level.

The vacuum level is set to be zero as the reference state. The band edge energies, that is, CBM and VBM can be obtained by aligning the eigenvalues to the vacuum level.

#### The favorable configurations of ligand modified MoS<sub>2</sub>

To determine the favorable adsorption configuration, three adsorption sites, including the top site of S (TS) and Mo atom (TM), and the hollow site of the hexagonal lattice (H site), are considered. The initial ligand orientations are set to be perpendicular or parallel to the surface. As shown in Fig. S1, for O<sub>2</sub> and H<sub>2</sub>O adsorption, the mass center locates at TM site and H site for the most favorable configuration, respectively. For COOH adsorption, the adsorption at the C side is found to be the energetically most favorable configuration. For C<sub>6</sub>H<sub>5</sub>CN and C<sub>6</sub>H<sub>5</sub>CH<sub>2</sub>NH<sub>2</sub> adsorption, there is a tilt angle between the ligand and the surface for the most favorable configuration.

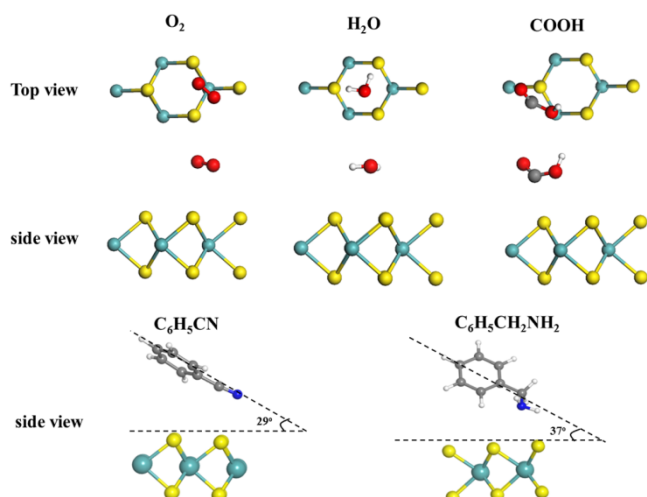

**Fig. S1** Top and side views of the most favorable configurations for  $O_2$ ,  $H_2O$  and  $COOH$  on ML-MoS<sub>2</sub> and side view of  $C_6H_5CN$  and  $C_6H_5CH_2NH_2$  on ML-MoS<sub>2</sub>.

### The average electrostatic potential of $C_6H_5CN$ modified MoS<sub>2</sub>

The work function, that is,  $W = V(\infty) - E_F$ , where,  $V(\infty)$ ,  $E_F$  is the electrostatic potential of the vacuum level and Fermi level, respectively. We defined the work function change caused by ligand with respect to the pure MoS<sub>2</sub> surface as  $\Delta W = W_{ligand/MoS_2} - W_{MoS_2}$ . As shown in Fig. S2, for  $C_6H_5CN$  modified MoS<sub>2</sub>, the work function reduced by 1.534 eV compared to pure MoS<sub>2</sub>, leading the band edge up-shift by 1.534 eV.

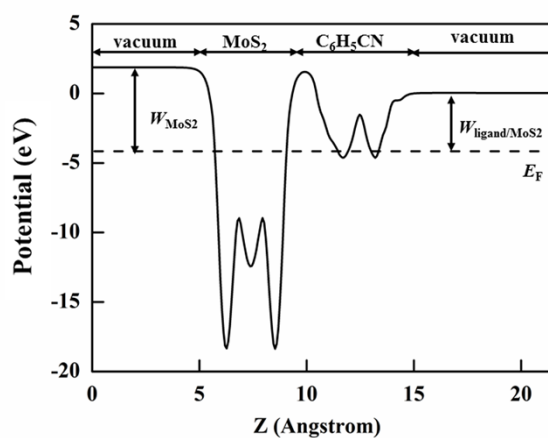

**Fig. S2.** The average electrostatic potential of  $C_6H_5CN$  modified MoS<sub>2</sub>, where MoS<sub>2</sub> is a 2×2 supercell.

### The average electrostatic potential of MoS<sub>2</sub>/graphene

The band edge upshifts by  $\sim 0.06$  eV for MoS<sub>2</sub>/G compared to free-standing MoS<sub>2</sub> as shown in Fig. S3(a). This shift comes from the induced dipole moment of MoS<sub>2</sub> because the presence of graphene breaks the symmetry of MoS<sub>2</sub>, and induced interface dipole moment between MoS<sub>2</sub>/graphene.

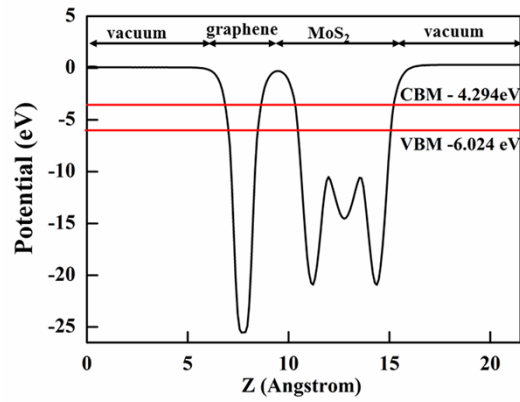

**Fig. S3.** (a) Average electrostatic potential of MoS<sub>2</sub>/graphene (black solid line), the red solid lines denote the CBM and VBM of the hybrid nanostructure.
